# Supplementary material for: Phase-separating pyrenoid proteins form complexes in the dilute phase
Source: PubMed Central journal article supplement (PMC9825591; doi:10.1038/s42003-022-04373-x), 2023-01-07
Supplement: 42003_2022_4373_MOESM3_ESM.pdf [file 42003_2022_4373_MOESM3_ESM.pdf]

## **Description of Additional Supplementary Files**

File name: Supplementary Data 1

Description: The source data behind the main figures in the paper.
